# Supplementary material
Source: Elsevier journal article supplement (https://comptes-rendus.academie-sciences.fr/chimie/article/10.1016/j.crci.2007.03.004/file/attach/mmc1.pdf)
Supplement: mmc1 [file mmc1.pdf]

## Supporting Information

### On the Structure and Relative Stability of Uranyl(VI) Sulfate Complexes in Solution.

*Valérie Vallet<sup>1</sup> and Ingmar Grenthe<sup>2</sup>*

<sup>1</sup>Laboratoire PhLAM (CNRS UMR 8523), CERLA (CNRS FR 2416), Université de Sciences et Technologies de Lille1, F-59655 Villeneuve d'Ascq Cedex, France

<sup>2</sup>Department of Chemistry, Inorganic Chemistry, Royal Institute of Technology (KTH), Teknikringen 36, S-10044 Stockholm, Sweden

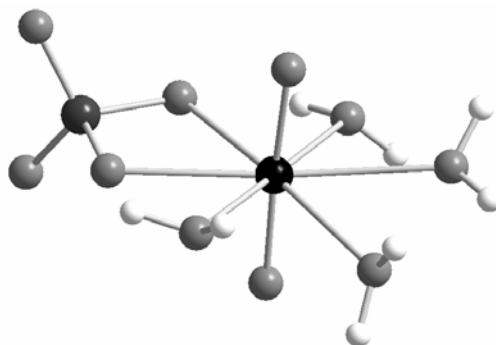

**Figure S1.** Structure of the six coordinated isomer  $[\text{UO}_2(\text{SO}_{4\text{-chel}})(\text{OH}_2)_4]$ . The average distance  $\text{U} - \text{O}_{\text{eq}}$  is 2.51 Å. There are only very weak hydrogen bond interactions within the first coordination sphere with  $\text{H} - \text{O}$  distances larger than 2.1 Å.

---

<sup>1</sup> valerie.vallet@univ-lille1.fr

<sup>2</sup> ingmarg@kth.se

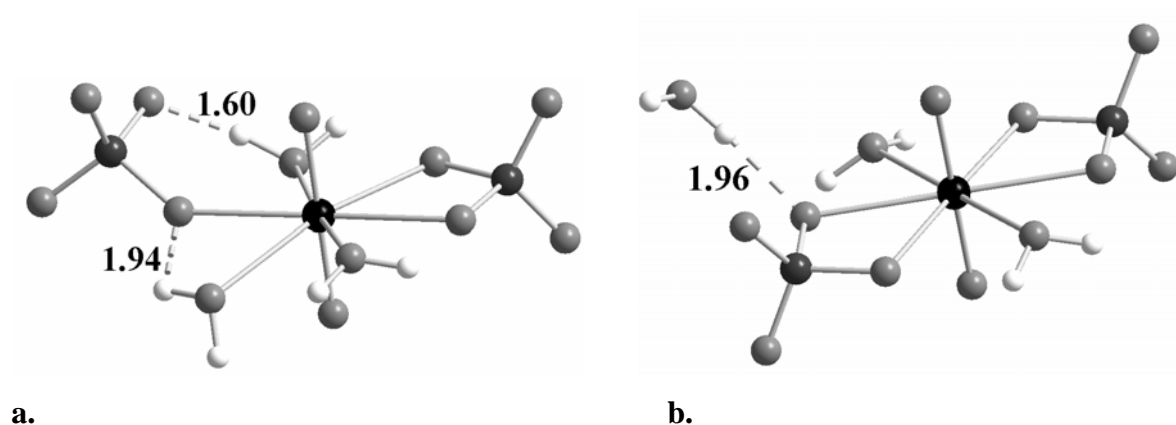

**Figure S2.** Structure of the six coordinated bonding isomer of  $\text{UO}_2(\text{SO}_4)_2^{2-}$ : a.  $[\text{UO}_2(\text{SO}_4\text{-chel})(\text{SO}_4\text{-mono})(\text{OH}_2)_3]^{2-}$  and b.  $[\text{UO}_2(\text{SO}_4\text{-chel})_2(\text{H}_2\text{O})_2]^{2-}, (\text{OH}_2)$ . The dashed lines denote hydrogen bonds. In a. there is only one reasonably strong hydrogen bond at 1.60 Å; the hydrogen bond interactions of the other two water ligands are very weak. In b. the second sphere water is very weakly bonded to one sulfate group. There are no hydrogen-bond interactions involving the coordinated water.

**Table S1.** Total electronic energies in au for the various complexes computed at the DFT-B3PW91 and MP2 levels in the CPCM solvent model.

| Complex                                                                                                                                 | E(B3PW91)      | G(B3PW91)    | E(MP2)           | G(MP2)       |
|-----------------------------------------------------------------------------------------------------------------------------------------|----------------|--------------|------------------|--------------|
| UO <sub>2</sub> (SO <sub>4</sub> -mono)(OH <sub>2</sub> ) <sub>4</sub>                                                                  | -1632.62016456 | -1632.552129 | -1629.3577438738 | -1629.289708 |
| [UO <sub>2</sub> (SO <sub>4</sub> -mono)(OH <sub>2</sub> ) <sub>4</sub> ],Na                                                            | -1794.82900804 | -1794.829008 | -1791.1874599669 | -1791.123513 |
| [UO <sub>2</sub> (SO <sub>4</sub> -chel)(OH <sub>2</sub> ) <sub>3</sub> ],(H <sub>2</sub> O)                                            | -1632.62483164 | -1632.557076 | -1629.3639421147 | -1629.296187 |
| [UO <sub>2</sub> (SO <sub>4</sub> -chel)(OH <sub>2</sub> ) <sub>3</sub> ],(H <sub>2</sub> O),Na                                         | -1794.82900804 | -            | -1791.1913741436 | -            |
| [UO <sub>2</sub> (SO <sub>4</sub> -mono) <sub>2</sub> (OH <sub>2</sub> ) <sub>3</sub> ] <sup>2-</sup>                                   | -2255.53025205 | -2255.473006 | -2251.3634496638 | -2251.306204 |
| [UO <sub>2</sub> (SO <sub>4</sub> -chel)(SO <sub>4</sub> -mono)(OH <sub>2</sub> ) <sub>2</sub> ] <sup>2-</sup> , (H <sub>2</sub> O)     | -2255.52910522 | -            | -2251.3631341250 | -            |
| [UO <sub>2</sub> (SO <sub>4</sub> -chel)(SO <sub>4</sub> -mono)(OH <sub>2</sub> ) <sub>3</sub> ] <sup>2-</sup>                          | -2255.52093766 | -2255.461753 | -2251.3592256576 | -2251.300041 |
| [UO <sub>2</sub> (SO <sub>4</sub> -chel) <sub>2</sub> (OH <sub>2</sub> ) <sub>2</sub> ] <sup>2-</sup> , (H <sub>2</sub> O) <sub>2</sub> | -2255.52426795 | -2255.475267 | -2251.3601842663 | -2251.311183 |
| [UO <sub>2</sub> (SO <sub>4</sub> -chel) <sub>2</sub> (H <sub>2</sub> O) <sub>2</sub> ] <sup>2-</sup> , (OH <sub>2</sub> )              | -2255.52911480 | -2255.471836 | -2251.3702361557 | -2251.312957 |

**Table S2.** Cartesian coordinates in Å of the various isomers of  $[\text{UO}_2(\text{H}_2\text{O})_5]^{2+}, (\text{H}_2\text{O})$ ,  $\text{UO}_2(\text{SO}_4)$ , and  $\text{UO}_2(\text{SO}_4)_2^{2-}$  complexes. Geometries were optimized with DFT-B3PW91 in the CPCM solvent model.

| Complex                                                   | Figure  | Coordinates                     |
|-----------------------------------------------------------|---------|---------------------------------|
| $[\text{UO}_2(\text{OH}_2)_5]^{2+}, (\text{H}_2\text{O})$ | -       | U -0.224313 0.022279 0.095159   |
|                                                           |         | O -0.508930 -0.044188 -1.626245 |
|                                                           |         | O 1.791862 1.386900 -0.155043   |
|                                                           |         | O -0.879253 -2.307357 0.200912  |
|                                                           |         | O -0.042168 0.086177 1.830502   |
|                                                           |         | O 1.752680 -1.415259 -0.051269  |
|                                                           |         | O -2.615897 0.090107 0.408957   |
|                                                           |         | O -0.794390 2.378962 0.002215   |
|                                                           |         | H -1.393355 -2.771969 -0.486926 |
|                                                           |         | H -0.939482 -2.840595 1.016720  |
|                                                           |         | H 1.743944 -2.278346 -0.501510  |
|                                                           |         | H 2.685593 -1.097982 -0.008505  |
|                                                           |         | H -3.293145 0.035617 -0.291821  |
|                                                           |         | H -3.082683 0.146232 1.264218   |
|                                                           |         | H 1.811160 2.191705 -0.702690   |
|                                                           |         | H 2.713861 1.041554 -0.082407   |
|                                                           |         | H -1.366302 2.777540 -0.681423  |
|                                                           |         | H -0.777104 2.995943 0.758789   |
|                                                           |         | O 4.043229 -0.035257 0.080922   |
|                                                           |         | H 4.683129 -0.069142 -0.653497  |
| H 4.571185 -0.006650 0.899652                             |         |                                 |
| $\text{UO}_2(\text{SO}_4\text{-mono})(\text{OH}_2)_4$     | Fig. 1a | U -0.614795 -0.071315 -0.117260 |
|                                                           |         | O -0.516294 0.017170 1.636413   |
|                                                           |         | O -0.835550 -0.176963 -1.860933 |
|                                                           |         | O -0.519688 2.419061 -0.267682  |
|                                                           |         | O -2.903836 0.812099 -0.001099  |
|                                                           |         | O -2.200276 -2.004901 0.131325  |
|                                                           |         | O 0.555968 -2.200887 -0.046763  |
|                                                           |         | O 1.537511 0.435197 -0.313979   |
|                                                           |         | S 2.959346 0.096948 0.315456    |
|                                                           |         | O 3.967510 0.392471 -0.734301   |
|                                                           |         | O 2.886972 -1.388905 0.627215   |

|                                                                                              |        |    |           |           |           |
|----------------------------------------------------------------------------------------------|--------|----|-----------|-----------|-----------|
|                                                                                              |        | O  | 3.117718  | 0.910983  | 1.546997  |
|                                                                                              |        | H  | 0.330708  | 2.839732  | -0.487034 |
|                                                                                              |        | H  | -1.216816 | 2.970768  | -0.664053 |
|                                                                                              |        | H  | -3.367587 | 1.109615  | 0.803602  |
|                                                                                              |        | H  | -3.504066 | 0.967136  | -0.754169 |
|                                                                                              |        | H  | -3.155077 | -1.901347 | 0.288243  |
|                                                                                              |        | H  | -1.923186 | -2.795369 | 0.627890  |
|                                                                                              |        | H  | 1.518323  | -2.012917 | 0.217822  |
|                                                                                              |        | H  | 0.576194  | -2.773395 | -0.833452 |
| [UO <sub>2</sub> (SO <sub>4</sub> -mono)(OH <sub>2</sub> ) <sub>4</sub> ],Na                 | -      | O  | -0.205041 | 0.008773  | -1.605295 |
|                                                                                              |        | U  | -0.614944 | -0.086998 | 0.099812  |
|                                                                                              |        | O  | -2.196447 | -1.877227 | -0.488917 |
|                                                                                              |        | O  | -0.476423 | 2.381800  | 0.345837  |
|                                                                                              |        | O  | 1.485180  | 0.409345  | 0.743812  |
|                                                                                              |        | S  | 2.998545  | 0.081550  | 0.488696  |
|                                                                                              |        | O  | 3.497578  | 0.950919  | -0.621264 |
|                                                                                              |        | O  | -1.157312 | -0.233236 | 1.765150  |
|                                                                                              |        | O  | 0.582933  | -2.208070 | 0.201666  |
|                                                                                              |        | O  | -2.753437 | 1.021299  | -0.410723 |
|                                                                                              |        | O  | 3.040699  | -1.384879 | 0.138035  |
|                                                                                              |        | O  | 3.744005  | 0.392839  | 1.747734  |
|                                                                                              |        | H  | 1.574026  | -2.045073 | 0.186221  |
|                                                                                              |        | H  | 0.396227  | -2.839803 | 0.917879  |
|                                                                                              |        | H  | -3.192847 | 0.992266  | -1.280328 |
|                                                                                              |        | H  | -3.445265 | 1.204283  | 0.251278  |
|                                                                                              |        | H  | -1.014046 | 3.011611  | -0.164252 |
|                                                                                              |        | H  | 0.340561  | 2.838949  | 0.609449  |
|                                                                                              |        | H  | -2.795872 | -2.316940 | 0.141443  |
|                                                                                              |        | H  | -2.035194 | -2.507082 | -1.214809 |
|                                                                                              |        | Na | 5.158316  | 2.113734  | 0.758463  |
| [UO <sub>2</sub> (SO <sub>4</sub> -chel)(OH <sub>2</sub> ) <sub>3</sub> ],(H <sub>2</sub> O) | Fig 1b | U  | 0.541201  | 0.091317  | -0.038117 |
|                                                                                              |        | O  | 0.530672  | -0.337283 | -1.744650 |
|                                                                                              |        | O  | -1.384467 | 1.443566  | -0.242006 |
|                                                                                              |        | O  | -3.269880 | 0.745323  | 1.243235  |
|                                                                                              |        | O  | 0.705659  | 0.477282  | 1.670809  |
|                                                                                              |        | O  | 0.913559  | -2.241724 | 0.489187  |

|                                                                                                 |         |    |           |           |           |
|-------------------------------------------------------------------------------------------------|---------|----|-----------|-----------|-----------|
|                                                                                                 |         | O  | 2.968155  | 0.053731  | -0.152325 |
|                                                                                                 |         | O  | 1.207785  | 2.424657  | -0.613072 |
|                                                                                                 |         | O  | -1.633964 | -0.860782 | 0.245773  |
|                                                                                                 |         | O  | -3.361480 | 0.244149  | -1.191201 |
|                                                                                                 |         | O  | -1.198760 | -3.582396 | -0.173405 |
|                                                                                                 |         | S  | -2.522634 | 0.407473  | 0.014109  |
|                                                                                                 |         | H  | 0.183066  | -2.875366 | 0.206538  |
|                                                                                                 |         | H  | 1.202099  | -2.507277 | 1.379882  |
|                                                                                                 |         | H  | 3.505843  | -0.221585 | -0.917988 |
|                                                                                                 |         | H  | 3.583059  | 0.257741  | 0.576629  |
|                                                                                                 |         | H  | 0.520898  | 3.109651  | -0.700937 |
|                                                                                                 |         | H  | 1.895638  | 2.635317  | -1.269615 |
|                                                                                                 |         | H  | -1.760999 | -2.787870 | -0.182529 |
|                                                                                                 |         | H  | -1.288335 | -3.990727 | -1.049866 |
| [UO <sub>2</sub> (SO <sub>4</sub> -chel)(OH <sub>2</sub> ) <sub>3</sub> ],(H <sub>2</sub> O),Na | -       | U  | 0.225281  | 0.152580  | -0.011316 |
|                                                                                                 |         | O  | 0.174333  | -0.450695 | -1.663826 |
|                                                                                                 |         | O  | -1.482125 | 1.778116  | -0.423026 |
|                                                                                                 |         | O  | -3.397903 | 1.566264  | 1.156588  |
|                                                                                                 |         | O  | 0.429154  | 0.713055  | 1.644394  |
|                                                                                                 |         | O  | 0.278882  | -2.101212 | 0.767040  |
|                                                                                                 |         | O  | 2.621991  | -0.309694 | -0.065921 |
|                                                                                                 |         | O  | 1.282307  | 2.243002  | -0.805611 |
|                                                                                                 |         | O  | -2.066033 | -0.382102 | 0.359460  |
|                                                                                                 |         | O  | -3.650069 | 0.787318  | -1.186238 |
|                                                                                                 |         | O  | 0.051120  | -4.286531 | -0.610150 |
|                                                                                                 |         | S  | -2.741342 | 0.959116  | -0.034551 |
|                                                                                                 |         | H  | 0.187945  | -2.940635 | 0.220381  |
|                                                                                                 |         | H  | 0.278150  | -2.348739 | 1.707578  |
|                                                                                                 |         | H  | 3.115320  | -0.733245 | -0.791281 |
|                                                                                                 |         | H  | 3.265272  | -0.080216 | 0.628721  |
|                                                                                                 |         | H  | 0.964400  | 3.111546  | -0.499680 |
|                                                                                                 |         | H  | 1.558876  | 2.360922  | -1.732418 |
|                                                                                                 |         | H  | -0.725176 | -4.355551 | -1.190680 |
|                                                                                                 |         | H  | 0.812714  | -4.528736 | -1.163103 |
|                                                                                                 |         | Na | -5.368287 | 2.372707  | 1.925872  |
| [UO <sub>2</sub> (SO <sub>4</sub> -chel)(OH <sub>2</sub> ) <sub>4</sub> ]                       | Fig. S1 | U  | 0.485642  | 0.129034  | -0.050409 |



|                                                                                                                                       |          |          |           |           |           |
|---------------------------------------------------------------------------------------------------------------------------------------|----------|----------|-----------|-----------|-----------|
|                                                                                                                                       |          | H        | 1.505511  | -2.115950 | -0.556545 |
|                                                                                                                                       |          | H        | -2.031680 | 2.697607  | -0.386858 |
|                                                                                                                                       |          | H        | -2.617857 | 1.546069  | 0.542545  |
|                                                                                                                                       |          | H        | 0.681870  | 3.513938  | 0.244339  |
|                                                                                                                                       |          | H        | 1.967298  | 2.678476  | 0.543980  |
| [UO <sub>2</sub> (SO <sub>4</sub> -chel)(SO <sub>4</sub> -mono)(OH <sub>2</sub> ) <sub>2</sub> ] <sup>2-</sup><br>,(H <sub>2</sub> O) | Fig. 2b  | U        | 0.039985  | -0.378812 | -0.098205 |
|                                                                                                                                       |          | O        | -0.148675 | -0.532458 | 1.653189  |
|                                                                                                                                       |          | O        | 0.222336  | -0.291631 | -1.856758 |
|                                                                                                                                       |          | O        | -2.206160 | -0.252470 | -0.364231 |
|                                                                                                                                       |          | S        | -3.529833 | 0.441650  | 0.128143  |
|                                                                                                                                       |          | O        | -3.160074 | 1.905712  | 0.309189  |
|                                                                                                                                       |          | O        | -4.543736 | 0.267608  | -0.950188 |
|                                                                                                                                       |          | O        | -3.939518 | -0.181541 | 1.418250  |
|                                                                                                                                       |          | O        | -0.579231 | 2.001442  | 0.060257  |
|                                                                                                                                       |          | H        | -0.171861 | 2.537802  | 0.761022  |
|                                                                                                                                       |          | H        | -1.577574 | 2.083634  | 0.166092  |
|                                                                                                                                       |          | O        | -0.394007 | -2.784710 | -0.318918 |
|                                                                                                                                       |          | H        | -0.853019 | -3.342495 | 0.336195  |
|                                                                                                                                       |          | H        | -0.347628 | -3.294408 | -1.148910 |
|                                                                                                                                       |          | O        | 2.042370  | 0.968172  | 0.196826  |
|                                                                                                                                       |          | S        | 3.126389  | -0.154472 | 0.237743  |
|                                                                                                                                       |          | O        | 3.802450  | -0.172506 | 1.558324  |
|                                                                                                                                       |          | O        | 2.221383  | -1.401463 | 0.063411  |
|                                                                                                                                       |          | O        | 4.060934  | -0.017371 | -0.905854 |
|                                                                                                                                       |          | H        | 2.503041  | 2.760212  | -0.156040 |
| O                                                                                                                                     | 2.710391 | 3.699647 | -0.305345 |           |           |
| H                                                                                                                                     | 2.515862 | 3.843643 | -1.242840 |           |           |
| [UO <sub>2</sub> (SO <sub>4</sub> -chel)(SO <sub>4</sub> -mono)(OH <sub>2</sub> ) <sub>3</sub> ] <sup>2-</sup>                        | Fig. S2a | U        | 0.110179  | -0.262988 | -0.080712 |
|                                                                                                                                       |          | O        | 0.354733  | -0.237565 | -1.830474 |
|                                                                                                                                       |          | O        | -0.129219 | -0.293526 | 1.666318  |
|                                                                                                                                       |          | O        | -2.261148 | -0.267958 | -0.284553 |
|                                                                                                                                       |          | S        | -3.552530 | 0.283117  | 0.413138  |
|                                                                                                                                       |          | O        | -3.277677 | 1.752018  | 0.696922  |
|                                                                                                                                       |          | O        | -4.674675 | 0.126443  | -0.561246 |
|                                                                                                                                       |          | O        | -3.782562 | -0.476275 | 1.677380  |
|                                                                                                                                       |          | O        | 2.558249  | -0.455714 | 0.202560  |



|                                                                                      |         |   |           |           |           |
|--------------------------------------------------------------------------------------|---------|---|-----------|-----------|-----------|
|                                                                                      |         | S | 2.972528  | 1.028778  | 0.324521  |
|                                                                                      |         | O | 1.581119  | 1.691951  | 0.194441  |
|                                                                                      |         | O | 3.569298  | 1.303561  | 1.658623  |
|                                                                                      |         | O | 3.858396  | 1.429660  | -0.800400 |
|                                                                                      |         | O | -1.160599 | -2.513470 | -0.729515 |
|                                                                                      |         | H | -0.922003 | -2.915512 | -1.584158 |
|                                                                                      |         | H | -2.036723 | -2.109558 | -0.852372 |
|                                                                                      |         | O | 1.225121  | -2.554407 | 0.288549  |
|                                                                                      |         | H | 0.898181  | -3.429464 | 0.026225  |
|                                                                                      |         | H | 2.193959  | -2.562848 | 0.236404  |
|                                                                                      |         | O | -0.881863 | 2.010241  | -0.246257 |
|                                                                                      |         | H | -0.343526 | 2.709955  | 0.155383  |
|                                                                                      |         | H | -1.807268 | 2.052511  | 0.135792  |
| $[\text{UO}_2(\text{SO}_4\text{-chel})_2(\text{H}_2\text{O})]^{2-}, (\text{OH}_2)_2$ | Fig. 2c | U | -0.003093 | -0.001188 | 0.276154  |
|                                                                                      |         | O | -1.731691 | 0.354795  | 0.381089  |
|                                                                                      |         | O | -0.339800 | -1.532170 | -1.547164 |
|                                                                                      |         | S | -0.620213 | -2.849920 | -0.752809 |
|                                                                                      |         | O | -2.000228 | -3.323215 | -1.014512 |
|                                                                                      |         | O | 0.067077  | -0.001306 | 2.711813  |
|                                                                                      |         | O | 1.728652  | -0.357507 | 0.289355  |
|                                                                                      |         | O | 0.502515  | 2.312335  | 0.676994  |
|                                                                                      |         | S | 0.563516  | 2.848498  | -0.778983 |
|                                                                                      |         | O | -0.493234 | 3.860955  | -1.011260 |
|                                                                                      |         | O | -0.486051 | -2.315655 | 0.698984  |
|                                                                                      |         | O | 0.239756  | 1.532410  | -1.559863 |
|                                                                                      |         | O | 1.929375  | 3.318982  | -1.110474 |
|                                                                                      |         | O | 0.425603  | -3.859518 | -1.040788 |
|                                                                                      |         | H | -0.682666 | 0.168988  | 3.312991  |
|                                                                                      |         | H | 0.858433  | -0.138971 | 3.266144  |
|                                                                                      |         | H | 0.718541  | -1.693629 | -3.133834 |
|                                                                                      |         | O | 1.266291  | -1.818497 | -3.927727 |
|                                                                                      |         | H | 1.834672  | -2.570871 | -3.708148 |
|                                                                                      |         | H | -0.910031 | 1.702751  | -3.082493 |
|                                                                                      |         | O | -1.498186 | 1.832926  | -3.845958 |
|                                                                                      |         | H | -2.086454 | 2.551760  | -3.573020 |
| $[\text{UO}_2(\text{SO}_4\text{-chel})_2(\text{H}_2\text{O})]^{2-}, (\text{OH}_2)$   | Fig.    | U | -0.071119 | 0.054091  | 0.136465  |

---

|     |   |           |           |           |
|-----|---|-----------|-----------|-----------|
| S2b | O | 1.654400  | 0.276557  | -0.180555 |
|     | O | -1.797784 | -0.167634 | 0.449941  |
|     | O | -0.046862 | -1.938912 | -1.296029 |
|     | S | 0.217492  | -3.056327 | -0.257531 |
|     | O | 0.315137  | -2.201854 | 1.028958  |
|     | O | 1.507527  | -3.741517 | -0.535501 |
|     | O | -0.934126 | -3.994012 | -0.185568 |
|     | O | -0.448307 | 2.342992  | -0.744661 |
|     | S | -0.425227 | 3.168620  | 0.572230  |
|     | O | -0.168410 | 2.032537  | 1.587915  |
|     | O | 0.701402  | 4.137025  | 0.560924  |
|     | O | -1.744419 | 3.808576  | 0.813180  |
|     | O | 0.545762  | -0.197407 | 2.583805  |
|     | H | 0.227724  | 0.485001  | 3.198251  |
|     | H | 0.390853  | -1.064872 | 2.993965  |
|     | O | -0.653268 | 0.315968  | -2.318735 |
|     | H | -0.992538 | -0.491802 | -2.741098 |
|     | H | -1.258722 | 1.041125  | -2.549316 |
|     | H | 0.541756  | 3.141032  | -2.176228 |
|     | O | 1.001349  | 3.599478  | -2.901426 |
|     | H | 1.373931  | 4.389345  | -2.484028 |

---
